# Supplementary material
Source: publisher figshare collection journal article supplement (https://karger.figshare.com/ndownloader/files/14859968)
Supplement: Supplementary file 1 [file 14859968]

**Fig. S3.** Autofluorescent images of *A. annua* pollen in three laser colors, red with excitation (543nm), green excitation 488nm and blue excitation 405nm.

W-pollen wall, N-pollen nuclei, A-pollen aperture.
